# Supplementary material
Source: publisher site journal article supplement (https://www.dovepress.com/get_supplementary_file.php?f=467975.docx)
Supplement: Supplementary file 1 [file get_supplementary_file.php]

# Supplementary Material 1: Data Collection Process

Prescriptions containing at least 1 ASM (n=3856)

Preliminary screening:

ASM indicated for epilepsy

Cases still actively followed-up in clinic (n=2258)

Subjects complied with inclusion criteria & records reviewed within the study period (minimum target sample n= 384)

Medical records were reviewed (n=397)

Retrospective data collection

-------------------------------------------------------------------------------------------------------------------------------------

All relevant information recorded in Case Report Form

Outcomes assessed using research tools (SSQ, LAEP)

Subjects who attended doctor’s appointment during the study period (n=105)
